# Supplementary material
Source: PubMed Central journal article supplement (PMC3426680)
Supplement: AEM.01720-12_zam999103642so1.pdf [file AEM.01720-12_zam999103642so1.pdf]

TABLE S1. Bacterial strains and plasmids used in this study.

| Strain or plasmid    | Relevant characteristic(s) <sup>a</sup>                                                            | Source or reference |
|----------------------|----------------------------------------------------------------------------------------------------|---------------------|
| <i>A. vinelandii</i> |                                                                                                    |                     |
| strains              |                                                                                                    |                     |
| UW136                | Rif <sup>r</sup> derived from strain UW (ATCC 13705)                                               | (1)                 |
| UW1                  | <i>nifA</i> <sup>-</sup>                                                                           | (6)                 |
| AVW552               | UW136 <i>vnf::Φ(nasA</i> <sup>-316 to +297</sup> <i>-lacZ)</i>                                     | This study          |
| AVW627               | UW136 <i>vnf::Φ(nasA</i> <sup>-316 to +297</sup> <i>-lacZ)</i> with +60 ATG→TAG mutation           | This study          |
| AVW643               | UW136 <i>vnf::Φ(nasA</i> <sup>-316 to +297</sup> <i>-lacZ)</i> with +14 to +100-nt deletion        | This study          |
| AVW650               | UW136 <i>vnf::Φ(nasA</i> <sup>-316 to +297</sup> <i>-lacZ)</i> with +14 to +25-nt deletion         | This study          |
| AVW663               | UW136 <i>vnf::Φ(nasA</i> <sup>-316 to +297</sup> <i>-lacZ)</i> with -24/-12 GG/GC → AA/AT mutation | This study          |
| AVW664               | UW136 <i>vnf::Φ(nasA</i> <sup>-316 to +297</sup> <i>-lacZ)</i> with +68 to +100-nt deletion        | This study          |
| AVW668               | UW136 <i>vnf::Φ(nasA</i> <sup>-316 to +297</sup> <i>-lacZ)</i> with +53 to +58-nt deletion         | This study          |
| AVW672               | UW136 <i>vnf::Φ(nasA</i> <sup>-131 to +297</sup> <i>-lacZ)</i> with +14 to +100-nt deletion        | This study          |

|                         |                                                                                                      |            |
|-------------------------|------------------------------------------------------------------------------------------------------|------------|
| AVW677                  | UW136 <i>vnf::Φ(nasA<sup>-43 to +297</sup>-lacZ)</i> with<br>+14 to +100-nt deletion                 | This study |
| AVW678                  | UW136 <i>vnf::Φ(nasA<sup>-108 to +297</sup>-lacZ)</i> with<br>+14 to +100-nt deletion                | This study |
| AVW693                  | UW136 <i>vnf::Φ(nasA<sup>-168 to +297</sup>-lacZ)</i> with<br>+14 to +100-nt deletion                | This study |
| AVW853                  | UW136 $\Delta nasC::Gm^r$                                                                            | This study |
| AVW816                  | UW136 $\Delta nasC::Gm^r$ <i>vnf::Φ(nasA<sup>-316 to +297</sup>-lacZ)</i>                            | This study |
| AVW908                  | UW136 <i>vnf::Φ(nasA<sup>-316 to +297</sup>-lacZ)</i> with<br>+68 to +100-nt deletion                | This study |
| AVW960                  | UW136 <i>vnf::Φ(P<sub>nasA</sub>-lacZ)</i>                                                           | This study |
| AVW961                  | UW136 $\Delta nasC::Gm^r$ <i>vnf::Φ(P<sub>nasA</sub>-lacZ)</i>                                       | This study |
| AVW962                  | UW1 <i>vnf::Φ(P<sub>nasA</sub>-lacZ)</i>                                                             | This study |
| <i>E. coli</i> strain   |                                                                                                      |            |
| DH5 $\alpha$            | <i>supE44 ΔlacU169 hsdR17 recA1 endA1</i><br><i>gyrA96 hi-1 relA1</i>                                | GIBCO-BRL  |
| MC1061                  | F <sup>-</sup> $\Delta(lacI-lacY)74 galE15 galK16 relA1$<br><i>rpsL150 spoT1 hsdR2 λ<sup>-</sup></i> | (2)        |
| Plasmids                |                                                                                                      |            |
| pBluescript II<br>KS(+) | Car <sup>r</sup> , cloning vector                                                                    | Stratagene |

|                  |                                                                                                                  |                             |
|------------------|------------------------------------------------------------------------------------------------------------------|-----------------------------|
| pBT              | Cm <sup>r</sup> ; bait vector of BacterioMatch® II two-hybrid system                                             | Stratagene                  |
| pBTW             | Cm <sup>r</sup> ; derivative of pBT, expression vector                                                           | This work                   |
| pBlue-lacZ       | Car <sup>r</sup> ; pBluescript II KS(+) containing <i>lacZ</i> from pSUP102::Tn5-B21 at <i>BamHI-XhoI</i> region | This study                  |
| pDK6             | Km <sup>r</sup> ; protein expression vector                                                                      | (4)                         |
| pDK6-S           | Km <sup>r</sup> ; pDK6 carrying <i>nasS</i> at <i>EcoRI-BamHI</i> region                                         | This work                   |
| pDK6-T           | Km <sup>r</sup> ; pDK6 carrying <i>nasT</i> at <i>EcoRI-BamHI</i> region                                         | This work                   |
| pICT4            | Car <sup>r</sup> ; pIC20H carrying four tandem copies of <i>rrnB1</i> cloned at the <i>SphI</i> site             | This study                  |
| pJW1             | Car <sup>r</sup> ; pTZ19 carrying <i>vnf</i> sequence                                                            | (8)                         |
| pKT2-lacZ        | Km <sup>r</sup> ; expression vector                                                                              | (Pierson, unpublished data) |
| pPROBE-NT        | Promoter-probe vector                                                                                            | (5)                         |
| pSUP102::Tn5-B21 | Cm <sup>r</sup> Tet <sup>r</sup> , Transposable promoter probe; B21 in pSUP102                                   | (7)                         |
| pTnMod-OGm       | Gm <sup>r</sup> ; pMB1, <i>mob_ Tn5 tnp</i>                                                                      | (3)                         |
| pVnflacZa        | Car <sup>r</sup> p15A; translational <i>lacZ</i> fusion probe vector                                             | This study                  |
| pVnflacZb        | Car <sup>r</sup> p15A; transcriptional <i>lacZ</i> fusion                                                        | This study                  |

|        | probe vector                                                                                                                                         |            |
|--------|------------------------------------------------------------------------------------------------------------------------------------------------------|------------|
| pWB30  | Car <sup>r</sup> ; pBluescript II KS(+) carrying 7.8-kb <i>XhoI-XhoI</i> DNA fragment containing the 5' end of <i>nasA</i> and its upstream sequence | This study |
| pWB552 | Car <sup>r</sup> ; pVnflacZa carrying <i>nasA'</i> -' <i>lacZ</i>                                                                                    | This study |
| pWB555 | Cm <sup>r</sup> , pBTW carrying <i>lacUV5-nasA'</i> -' <i>lacZ</i> fusion                                                                            | This work  |
| pWB627 | Car <sup>r</sup> ; pWB552 with ATG→TAG mutation in the <i>nasAB</i> leader region                                                                    | This study |
| pWB643 | Car <sup>r</sup> ; pWB552 with +14 to +100-nt deletion in the <i>nasAB</i> leader region                                                             | This study |
| pWB650 | Car <sup>r</sup> ; pWB552 with +14 to +25-nt deletion in the <i>nasAB</i> leader region                                                              | This study |
| pWB663 | Car <sup>r</sup> ; pWB552 with -24/-12 GG/GC → AA/AT mutation at the <i>nasAB</i> promoter                                                           | This study |
| pWB664 | Car <sup>r</sup> ; pWB552 with +53 to +58-nt deletion in the <i>nasAB</i> leader region                                                              | This study |
| pWB668 | Car <sup>r</sup> ; pWB552 with +68 to +100-nt deletion at the leader region                                                                          | This study |
| pWB672 | Car <sup>r</sup> ; pWB643 with the 5' end upstream of the <i>nasAB</i> promoter at -131                                                              | This study |
| pWB677 | Car <sup>r</sup> ; pWB643 with the 5' end upstream of the <i>nasAB</i> promoter at -43                                                               | This study |

|        |                                                                                                                                   |            |
|--------|-----------------------------------------------------------------------------------------------------------------------------------|------------|
| pWB678 | Car <sup>r</sup> ; pWB643 with the 5' end upstream of the <i>nasAB</i> promoter at -108                                           | This study |
| pWB680 | Car <sup>r</sup> ; pGEM-T carrying the <i>ntrC</i> gene                                                                           | This study |
| pWB685 | Gm <sup>r</sup> Car <sup>r</sup> ; pWB680 with $\Delta ntrC::Gm^r$                                                                | This study |
| pWB693 | Car <sup>r</sup> ; pWB643 with the 5' end upstream of the <i>nasAB</i> promoter at -168                                           | This study |
| pWB700 | Car <sup>r</sup> ; pVnflacZa carrying <i>nirB'</i> -' <i>lacZ</i>                                                                 | This study |
| pWB901 | Cm <sup>r</sup> ; pBTW carrying <i>lacUV5-nasA'</i> -' <i>lacZ</i> fusion with the 5' stem of hairpin I deleted                   | This work  |
| pWB902 | Cm <sup>r</sup> ; pBTW carrying <i>lacUV5-nasA'</i> -' <i>lacZ</i> fusion with the part of loop and 3' stem of hairpin II deleted | This work  |
| pWB910 | Cm <sup>r</sup> ; pBTW carrying <i>lacUV5-nasA'</i> -' <i>lacZ</i> fusion with hairpin III deleted                                | This work  |
| pWhite | Car <sup>r</sup> ; cloning vector                                                                                                 | This study |
| pWvnf  | Car <sup>r</sup> ; pWhite carrying 2.8-kb <i>vnf</i> sequence                                                                     | This study |

---

<sup>a</sup> Abbreviations: Car, carbenicillin; Cm, chloramphenicol; Gm, gentamicin; Km, kanamycin; Rif, rifampicin; Tet, tetracycline; *nasA'*, DNA sequence -316 to +297 around the *nasAB* promoter.

## References

1. **Bishop, P. E., and W. J. Brill.** 1977. Genetic analysis of *Azotobacter vinelandii* mutant strains unable to fix nitrogen. *J. Bacteriol.* **130**:954-6.
2. **Casadaban, M. J., and S. N. Cohen.** 1980. Analysis of gene control signals by DNA fusion and cloning in *Escherichia coli*. *J. Mol. Biol.* **138**:179-207.
3. **Dennis, J. J., and G. J. Zylstra.** 1998. Plasposons: Modular Self-Cloning Minitransposon Derivatives for Rapid Genetic Analysis of Gram-Negative Bacterial Genomes. *Appl. Environ. Microbiol.* **64**:2710-2715.
4. **Kleiner, D., W. Paul, and M. J. Merrick.** 1988. Construction of multicopy expression vectors for regulated over-production of proteins in *Klebsiella pneumonia* and other enteric bacteria. *J. Gen. Microbiol.* **134**:1779-84.
5. **Miller, W. G., J. H. J. Leveau, and S. E. Lindow.** 2000. Improved *gfp* and *inaZ* Broad-Host-Range Promoter-Probe Vectors. *Molecular Plant-Microbe Interactions* **13**:1243-1250.
6. **Shah, V. K., J. L. Pate, and W. J. Brill.** 1973. Protection of nitrogenase in *Azotobacter vinelandii*. *J. Bacteriol.* **115**:15-7.
7. **Simon, R., J. r. Quandt, and W. Klipp.** 1989. New derivatives of transposon *tn5* suitable for mobilization of replicons, generation of operon fusions and induction of genes in Gram-negative bacteria. *Gene* **80**:161-169.
8. **Walmsley, J., and C. Kennedy.** 1991. Temperature-Dependent Regulation by Molybdenum and Vanadium of Expression of the Structural Genes Encoding Three Nitrogenases in *Azotobacter vinelandii*. *Appl. Environ. Microbiol.* **57**:622-4.
