# Supplementary material
Source: PubMed Central journal article supplement (PMC3426680)
Supplement: AEM.01720-12_zam999103642so2.pdf [file AEM.01720-12_zam999103642so2.pdf]

TABLE S2. Primers used in this study.

| Primer | Sequence* (5'—3')                    | Restriction enzyme† and use                                                         |
|--------|--------------------------------------|-------------------------------------------------------------------------------------|
| P1     | GTTGCCGTCCCTGGTATGG                  | PCR <i>ntrC</i> from the <i>A. vinelandii</i> genome                                |
| P2     | GTGGACACGGCATAGATTTTC                | PCR <i>ntrC</i> from the <i>A. vinelandii</i> genome                                |
| P3     | <u>AGAGCTCAGCCATGCC</u> CAGGAG       | <i>SacI</i> ; <i>ntrC</i> deletion mutation construction                            |
| P4     | <u>AGAGCTCGGCTTGGG</u> CAGGTATTC     | <i>SacI</i> ; <i>ntrC</i> deletion mutation construction                            |
| P5     | AAAT <u>CTAGAAGCAGCGCTTC</u> GAAAC   | <i>XbaI</i> ; PCR <i>nasAB</i> promoter region from the <i>A. vinelandii</i> genome |
| P6     | <u>TGGATCCATGCCG</u> GCCAGCACCGGAGAG | <i>BamHI</i> ; PCR <i>nasAB</i> promoter region from the <i>A.</i>                  |

|     |                                       |                                                                                  |
|-----|---------------------------------------|----------------------------------------------------------------------------------|
|     |                                       | <i>vinelandii</i> genome                                                         |
| P8  | AGCTGGGGCCGCAATTC                     | PCR tandem <i>rrnBI</i><br>from pPROBE-NT                                        |
| P9  | ATTCAGCTTCCGATC                       | PCR tandem <i>rrnBI</i><br>from pPROBE-NT                                        |
| P10 | CCGACAGAACGGGATAGGACAAAGGCGTC         | <i>nasAB</i> leader small<br>ORF mutation                                        |
| P11 | CCTATCCCGTTCTGTCAAAGGCGTC             | <i>nasAB</i> leader small<br>ORF mutation                                        |
| P12 | GCAGTGTTTCCCGACAGGAATGGACAAAGGCGTC    | <i>nasAB</i> leader<br>hairpin II deletion<br>mutation                           |
| P13 | CTGTCGGGAAACACTGC                     | <i>nasAB</i> leader<br>hairpin II deletion<br>mutation                           |
| P14 | GGGGATCGGAAGCTGAATG                   | Confirmation of<br>tested sequence in<br>pVnflacZ(a/b)                           |
| P15 | GTCTCATGAGCGGATAC                     | Confirmation of<br><i>vnf</i> in pWhite                                          |
| P16 | <u>AGTCGACAAGCTT</u> CCTCGCTCACTGACTC | <i>Sal</i> I, <i>Hind</i> III; PCR<br><i>bla</i> and pM1 of<br>pBbluscript II KS |

|     |                                    |                                                                 |
|-----|------------------------------------|-----------------------------------------------------------------|
|     |                                    | (+)                                                             |
| P17 | AGAGCTCAGGTGGCACTTTTCG             | PCR <i>bla</i> and pM1<br>of pBbluscript II<br>KS (+)           |
| P18 | GTATTACCGCCTTTGAGTG                | Confirmation of<br><i>vnf</i> in pWhite                         |
| P19 | GTGATCTGTCGGTTTTTC                 | <i>nasAB</i> leader<br>hairpin I deletion<br>mutation           |
| P20 | AAACCGACAGATCACATAAACGTGGAGGGCAGTG | <i>nasAB</i> leader<br>hairpin I deletion<br>mutation           |
| P21 | AAATCTAGAACCAAGACAGTGCAAG          | <i>Xba</i> I; <i>nasAB</i><br>promoter deletion<br>construction |
| P22 | AAATCTAGAAACCCATAAGAGG             | <i>Xba</i> I; <i>nasAB</i><br>promoter deletion<br>construction |
| P23 | AAATCTAGAGCTCTGCTCGCCCTGTTG        | <i>Xba</i> I; <i>nasAB</i><br>promoter deletion<br>construction |
| P24 | AAATCTAGAGTCATCCGTGAAAC            | <i>Xba</i> I; <i>nasAB</i><br>promoter deletion                 |

|     |                                          |                                                          |
|-----|------------------------------------------|----------------------------------------------------------|
|     |                                          | construction                                             |
| P25 | CAAGGCGATTAAGTTGGGTAAC                   | Confirmation of<br>tested sequence in<br>pVnflacZ(a/b)   |
| P26 | GTAAAACGACGGCCAGTG                       | pBluescript II<br>KS(+) sequencing                       |
| P27 | CAGGAAACAGCTATGAC                        | pBluescript II<br>KS(+) sequencing                       |
| P28 | TAACACAGCCCCTATATCGAGAAAACCGAC           | $\sigma^{54}$ binding site<br>mutation                   |
| P29 | TATAGGGGCTGTGTTAGTTTCACGGATGACTG         | $\sigma^{54}$ binding site<br>mutation                   |
| P30 | CAGAACGGGAATGGACAATTTTTGTTTTCCGCTTT<br>C | Terminator hairpin<br>deletion mutation                  |
| P31 | AATTGTCCATTCCCGTTCTG                     | Terminator hairpin<br>deletion mutation                  |
| P32 | <u>AAGGATCCG</u> CTTATGTGATCTGTCTG       | <i>Bam</i> HI;<br>Transcriptional<br>fusion construction |
| P33 | AAAGAGCT <u>CATCATCTCG</u> CCAGTTC       | <i>Sac</i> I; PCR <i>vnf</i><br>sequence                 |
| P34 | AAACGCCT <u>CGAGA</u> AAGAGCATG          | <i>Xho</i> I; PCR <i>vnf</i><br>sequence                 |

|     |                                             |                                                            |
|-----|---------------------------------------------|------------------------------------------------------------|
| P35 | CGCCTGGCTCGACGAATG                          | <i>nasA</i> promoter<br>region cloning<br>confirmation     |
| P36 | GTCCATTCCCGTTCTGTC                          | <i>nasA</i> promoter<br>region cloning<br>confirmation     |
| P37 | <u>TCGAATTCC</u> ATGCTGCGCATCCTCCTG         | <i>EcoRI</i> ; Clone <i>nasT</i><br>into pDK6              |
| P38 | ATA <u>GATCTC</u> AGCTTCCCAGCATGTCGTGCATG   | <i>BglII</i> ; Clone <i>nasT</i><br>into pDK6              |
| P39 | ATAGA <u>ATTCC</u> ATGACAGACCACCACGCA ACTTC | <i>EcoRI</i> ; Clone <i>nasS</i><br>into pDK6              |
| P40 | ATA <u>AGATCTT</u> TAGGAGGATGCGCAG          | <i>BglII</i> ; Clone <i>nasS</i><br>into pDK6              |
| P41 | TCCGTTGTGGGAAAGTTATC                        | Construct pBTW                                             |
| P42 | <u>AGCGGCCGCT</u> CACAATTCCACAC             | Construct pBTW                                             |
| P43 | AGAG <u>CGGCCG</u> CCGACAGATCACATAAG        | <i>NotI</i> ; PCR <i>nasA'</i> -<br>' <i>lacZ</i> fragment |

---

\* The underlined sequences are the restriction sites.

† Restriction enzymes that can digest the underlined sequences.
